# Supplementary material for: Lithium-ion capacitor with improved energy density via perfect matching silicon@3D graphene aerogel anode and BCNNTs cathode
Source: Royal Society of Chemistry journal article supplement (doi:10.1039/d0ta09676h), 2020-12-11
Supplement: d0ta09676h1.pdf [file d0ta09676h1.pdf]

## Supporting Information

### Lithium-Ion Capacitor with Improved Energy Density via Perfect Matching Silicon@3D Graphene Aerogel Anode and BCNNTs Cathode

Hehe Jiang<sup>a</sup>, Shouzhi Wang<sup>a</sup>, Dong Shi<sup>a</sup>, Fuzhou Chen<sup>a</sup>, Yongliang Shao<sup>a,b</sup>, Yongzhong Wu<sup>a,b</sup>, Xiaopeng Hao<sup>\*a,b</sup>

<sup>a</sup>State Key Lab of Crystal Materials, Shandong University, Jinan, 250100, P. R. China.

<sup>b</sup>Department of Materials Science and Engineering, Qilu University of Technology, Jinan, 250353, P. R. of China.

### Results and Discussion

(Supplementary Figures S1–S11, Table S1 and S2)

**Table S1.** Comparison of the electrochemical properties of BCN cathode with other carbon-based cathodic materials.

| Cathode                   | Current density /mA g <sup>-1</sup> | Cycles | Specific Capacity /mAh g <sup>-1</sup> | Reference                                                                  |
|---------------------------|-------------------------------------|--------|----------------------------------------|----------------------------------------------------------------------------|
| TR-GO                     | 100                                 | 1000   | 44                                     | <i>ChemSusChem</i> <b>2013</b> , 6, 2240 – 2244                            |
| Amorphous carbon-graphite | 75                                  | 1000   | 48                                     | <i>Journal of Materials Science&amp;Technology</i> <b>2018</b> ,34,983–989 |
| BCNNTs                    | 100                                 | 200    | 108.8                                  | <b>This work</b>                                                           |

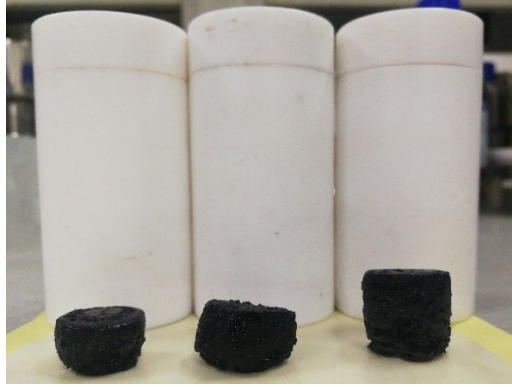

**Figure S1.** The photographs of SiO<sub>2</sub>@GA hybrid architectures prepared with 10 mL, 15 mL and 20 mL graphene (from left to right) after freeze-dried treatment.

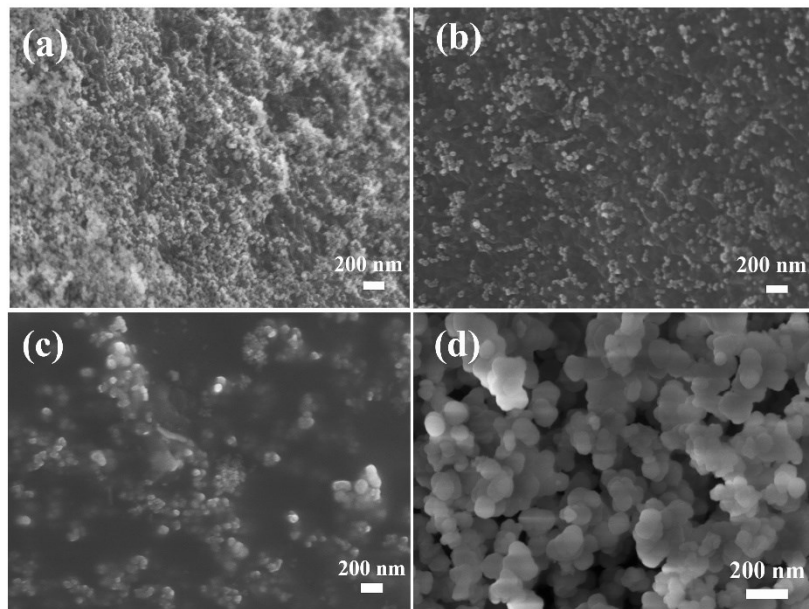

**Figure S2.** SEM image of Si@GA-1 sample (a), Si@GA-2 sample (b), Si@GA-3 (c) and pure Si samples (d).

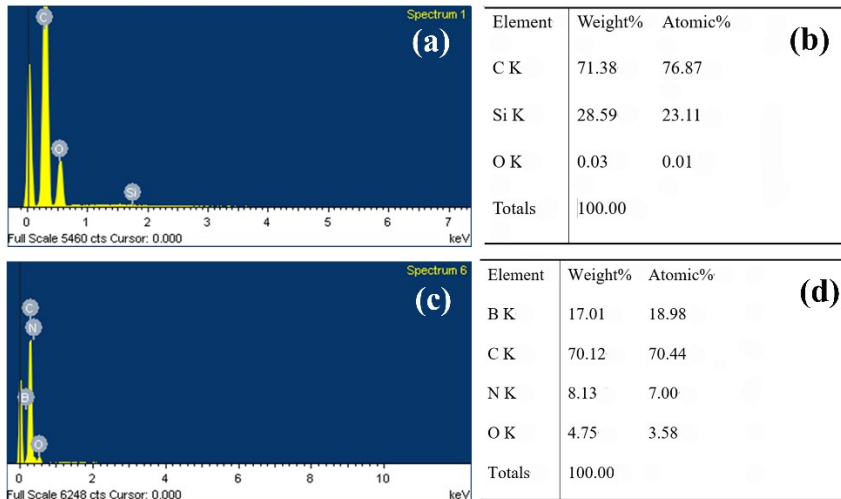

**Figure S3.** EDX analysis and related element contents of Si@GA-2 anode (a-b) and BCNNTs cathode (c-d).

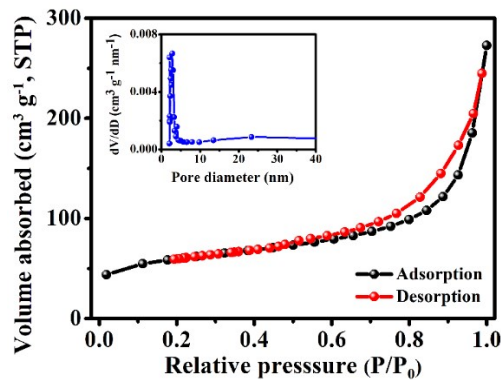

**Figure S4.** Nitrogen adsorption-desorption isotherm and the corresponding pore size distribution curve (inset) of BCNNTs cathode.

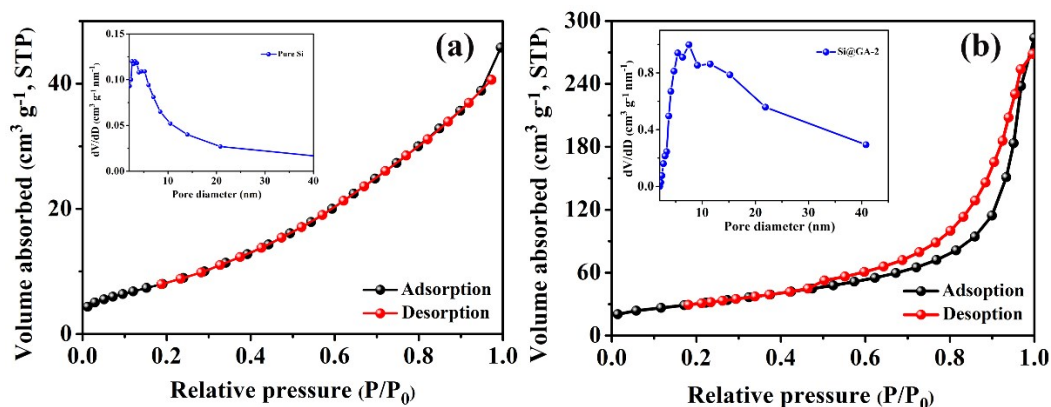

**Figure S5.** Nitrogen adsorption-desorption isotherm and the corresponding pore size distribution curve (inset) of pure Si (a) and Si@GA-2 anode (b).

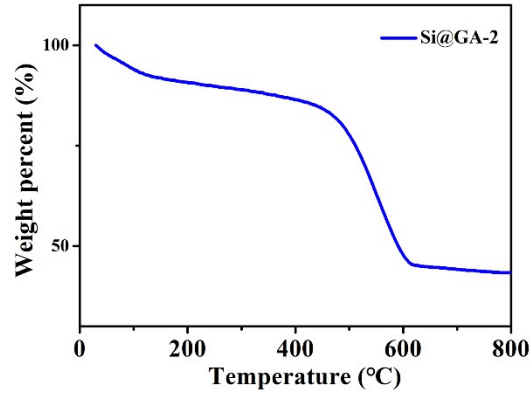

**Figure S6.** TG curve of Si@GA-2 anode.

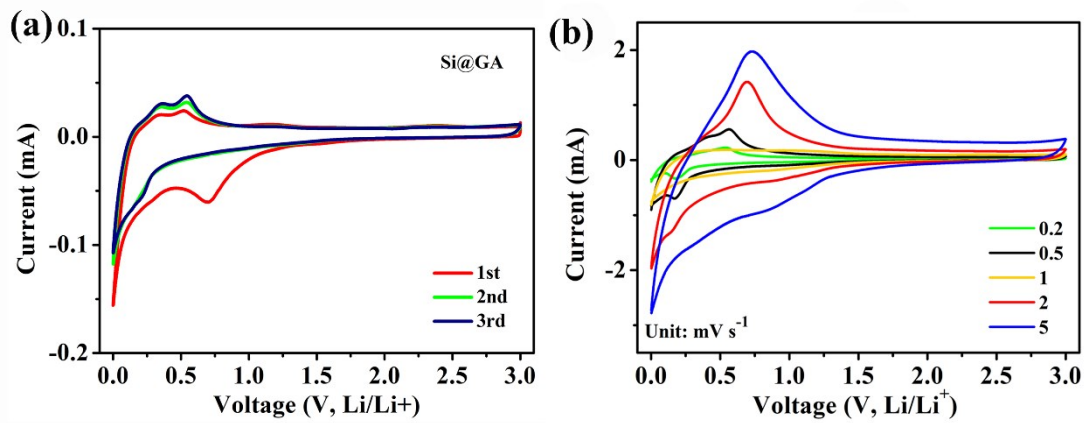

**Figure S7.** CV curves of Si@GA-2 anode for the initial 1st, 2nd, 3rd cycles at 0.1 mV s<sup>-1</sup> between 0.01 and 3.0 V (vs Li/Li<sup>+</sup>) (a). CV curves of Si@GA anode at various scan rates between 0.01 and 3.0 V (vs Li/Li<sup>+</sup>) (b).

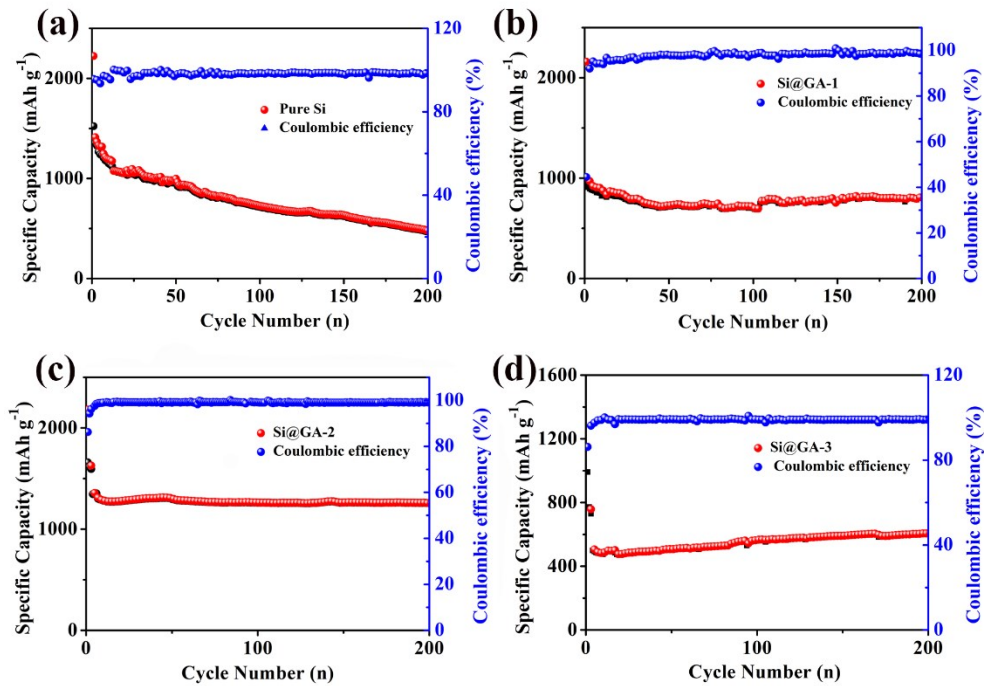

**Figure S8.** Cycling performances of pure Si anode (a), Si@GA-1 (b), Si@GA-2 (c) and Si@GA-3 (d) at a current density of  $0.1 \text{ A g}^{-1}$  between 3.0-0.01 V versus  $\text{Li}^+/\text{Li}$ .

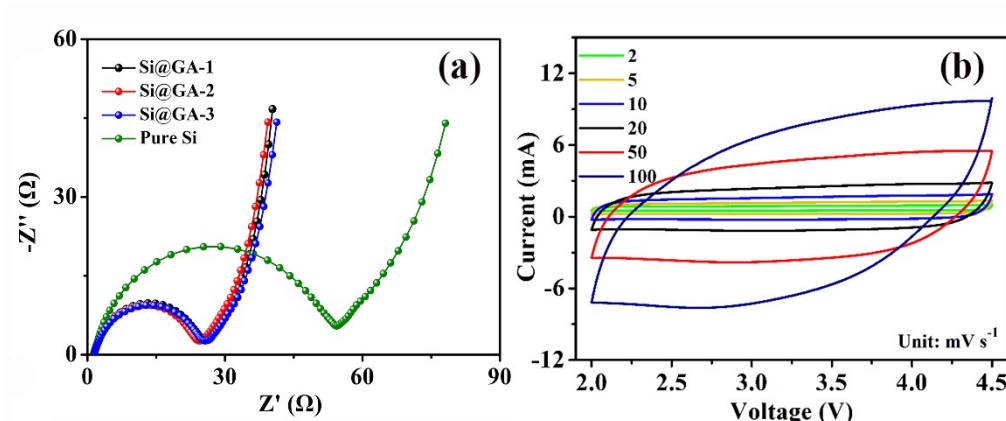

**Figure S9.** (a) Nyquist plots of pure Si and Si@GA electrodes with different graphene contents. (b) CV curves of BCNNTs cathode at different scan rates from  $2 \text{ mV s}^{-1}$  to  $100 \text{ mV s}^{-1}$  between 2.0 and 4.5 V (vs  $\text{Li}/\text{Li}^+$ ).

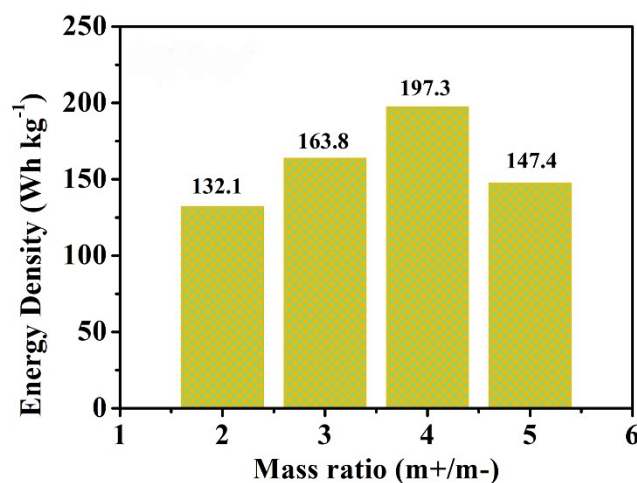

**Figure S10.** Energy densities of Si@GA/BCNNTs LIC with different mass ratios of cathode vs. anode materials under the same scan rate. (The energy density is  $197.3 \text{ Wh kg}^{-1}$  based on the total mass of cathodic and anodic active materials for the optimized ratio of 4:1)

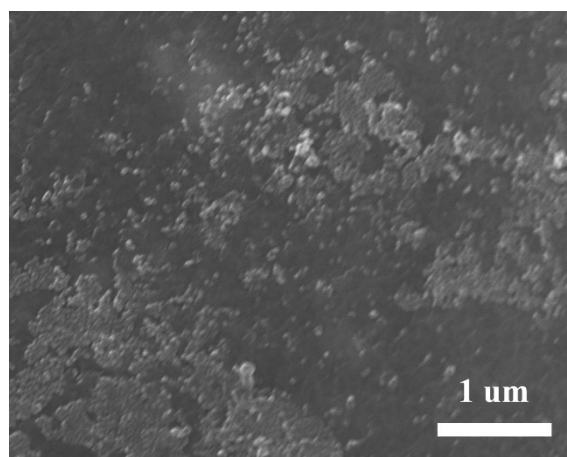

**Figure S11.** SEM image of Si@GA anode after 10000 cycles.

**Table S2.** Electrochemical performance of different anode electrodes and the relevant LICs.

| LICs                                                     | Max energy density (Wh kg <sup>-1</sup> ) | Power density (W kg <sup>-1</sup> ) | Voltage (V) | Ref. |
|----------------------------------------------------------|-------------------------------------------|-------------------------------------|-------------|------|
| B-Si/SiO <sub>2</sub> /C//PSC                            | 128                                       | 9704                                | 2-4.5       | [8]  |
| AC//LiNi <sub>0.5</sub> Mn <sub>1.5</sub> O <sub>4</sub> | 56                                        | 600                                 | 1-3         | [9]  |
| Fe <sub>3</sub> O <sub>4</sub> /granphene//3D-graphene   | 147                                       | 150                                 | 1-4         | [10] |
| Graphene-NiCo//AC                                        | 19.5                                      | 5600                                | 0-1.4       | [13] |
| VN/RGO//APDC                                             | 30                                        | 220                                 | 1-2.8       | [14] |
| SnO <sub>2</sub> /RGO//AC                                | 140                                       | 142                                 | 0-2.7       | [44] |

---

|                                                      |              |            |              |                  |
|------------------------------------------------------|--------------|------------|--------------|------------------|
| LiNbO <sub>3</sub> /GA//BCN                          | 148          | 200        | 0-4          | [45]             |
| Li <sub>4</sub> Ti <sub>5</sub> O <sub>12</sub> //AC | 50           | 2500       | 1-3          | [46]             |
| Li-HC//CS-AC                                         | 121          | ---        | 1.7-4.2      | [47]             |
| Mn <sub>3</sub> O <sub>4</sub> -G//AC                | 142          | 648        | 1.5-4        | [48]             |
| LiC <sub>6</sub> //AC-HBP                            | 111          | ---        | 2-3.9        | [49]             |
| HDMPC  HDMPC                                         | 106.4        | 500        | 1-4          | [51]             |
| <b>Si@GA//BCNNTs</b>                                 | <b>197.3</b> | <b>225</b> | <b>0-4.5</b> | <b>This work</b> |

(max: 11200)

---
